# Supplementary material for: Quasi-reversible conversion reaction of CoSe2/nitrogen-doped carbon nanofibers towards long-lifetime anode materials for sodium-ion batteries
Source: Royal Society of Chemistry journal article supplement (doi:10.1039/c8ta01168k), 2018-01-01
Supplement: c8ta01168k1.pdf [file c8ta01168k1.pdf]

## Supporting Information

### Quasi-reversible conversion reaction of CoSe<sub>2</sub>/nitrogen-doped carbon nanofibers towards long-lifetime anode materials for sodium-ion batteries

Chao Cui <sup>a</sup>, Zengxi Wei<sup>c</sup>, Gang Zhou <sup>a</sup>, Weifeng Wei <sup>a</sup>, Jianmin Ma <sup>c</sup>, Libao Chen <sup>a, \*</sup>, Chengchao

Li <sup>b, \*</sup>

<sup>a</sup> State Key Laboratory of Powder Metallurgy, Central South University, Changsha 410083, China

<sup>b</sup> School of Chemical Engineering and Light Industry, Guangdong University of Technology,

Guangzhou 510006, China.

<sup>c</sup>School of Physics and Electronics, Hunan University, Changsha 410082, China

\*Corresponding Authors.

[lbchen@csu.edu.cn](mailto:lbchen@csu.edu.cn).

[licc@gdut.edu.cn](mailto:licc@gdut.edu.cn).

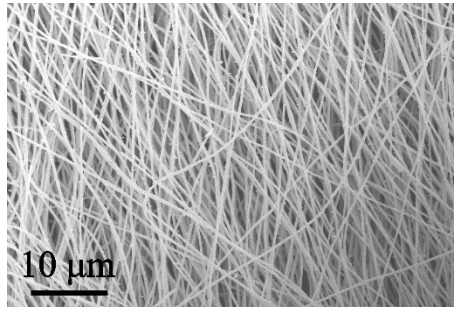

Fig. S1 SEM of CoSe<sub>2</sub>/N-CNFs.

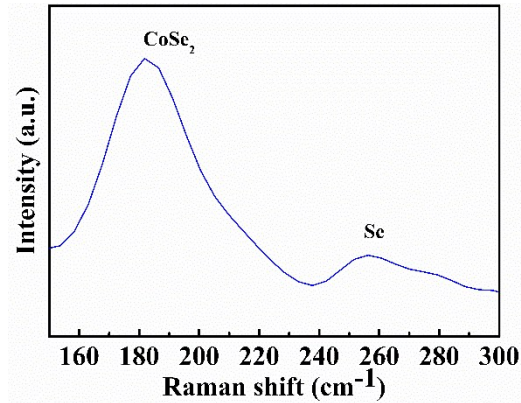

Fig. S2 Raman spectra of CoSe<sub>2</sub>/N-CNFs.

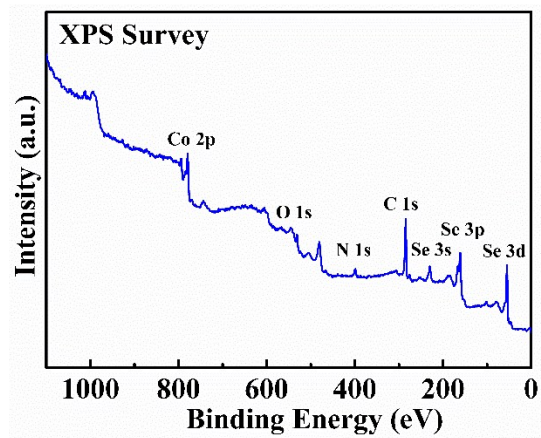

Fig. S3 XPS survey spectrum of CoSe<sub>2</sub>/N-CNFs.

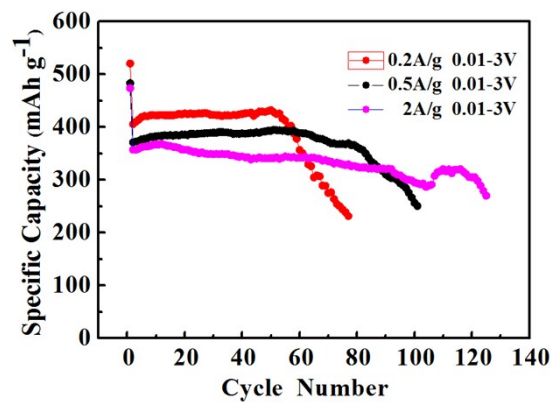

Fig. S4 Cycling performance of CoSe<sub>2</sub>/N-CNFs electrode between 0.01 and 3.0 V.

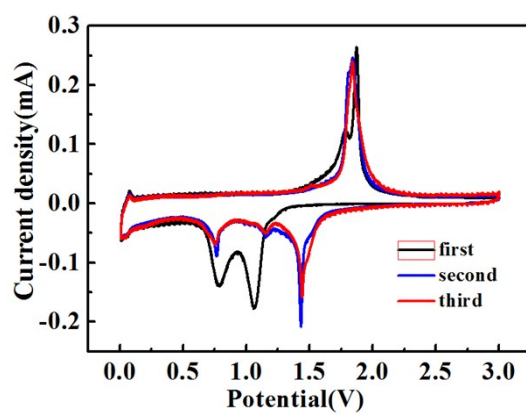

**Fig. S5** CV curves of  $\text{CoSe}_2/\text{N-CNFs}$  electrode for the first three cycles at  $0.2 \text{ mV s}^{-1}$  between 0.01 and 3.0 V.

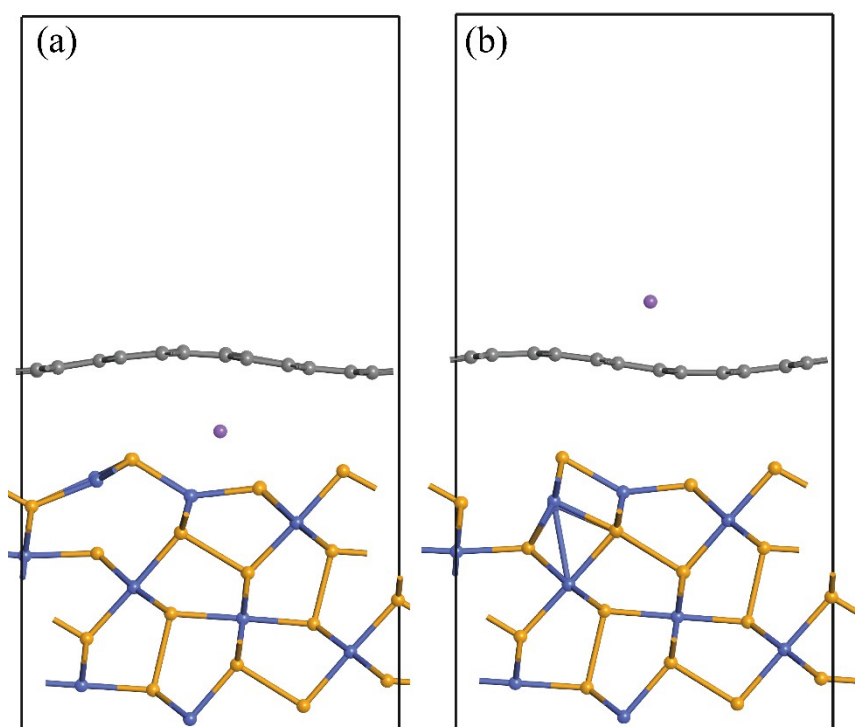

**Fig. S6** (a-b) side views of optimized  $\text{CoSe}_2(210)/\text{NC}$  structure with different adsorption sites of a Na atom, respectively. Gray, wathet, gold and purple spheres represent C, Co, Se and Na atom, respectively.
